# Supplementary material for: Agnostic Administration of Targeted Anticancer Drugs: Looking for a Balance between Hype and Caution
Source: MDPI journal article supplement (doi:10.3390/ijms25074094), 2024-04-07
Supplement: s1 [file s1]

**Supplementary Table S1.** Gene names and underlying explanations.

| Gene name            | HGNC* approved full name                                               | Previous name**                                                                                               |
|----------------------|------------------------------------------------------------------------|---------------------------------------------------------------------------------------------------------------|
| <i>ABL</i>           | ABL proto-oncogene 1, non-receptor tyrosine kinase                     | v-abl Abelson murine leukemia viral oncogene homolog 1                                                        |
| <i>AKT1</i>          | AKT serine/threonine kinase 1                                          | v-akt murine thymoma viral oncogene homolog 1                                                                 |
| <i>ALK</i>           | ALK receptor tyrosine kinase                                           | Anaplastic lymphoma kinase (Ki-1)                                                                             |
| <i>BCR</i>           | BCR activator of RhoGEF and GTPase                                     | Breakpoint cluster region                                                                                     |
| <i>BRAF</i>          | ABL proto-oncogene 1, non-receptor tyrosine kinase                     | v-abl Abelson murine leukemia viral oncogene homolog 1                                                        |
| <i>BRCA1</i>         | BRCA1 DNA repair associated                                            | Breast cancer 1, early onset                                                                                  |
| <i>BRCA2</i>         | BRCA2 DNA repair associated                                            | Breast cancer 2, early onset                                                                                  |
| <i>CCND1</i>         | Cyclin D1                                                              | Cyclin D1 (PRAD1: parathyroid adenomatosis 1)                                                                 |
| <i>CHEK2</i>         | Checkpoint kinase 2                                                    | CHK2 (checkpoint, S.pombe) homolog                                                                            |
| <i>EGFR</i>          | Epidermal growth factor receptor                                       | Epidermal growth factor receptor (avian erythroblastic leukemia viral (v-erb-b) oncogene homolog              |
| <i>FGFR1</i>         | Fibroblast growth factor receptor 1                                    | fms-related tyrosine kinase 2                                                                                 |
| <i>FGFR2</i>         | Fibroblast growth factor receptor 2                                    | Bacteria-expressed kinase                                                                                     |
| <i>FGFR3</i>         | Fibroblast growth factor receptor 3                                    | Achondroplasia, thanatophoric dwarfism                                                                        |
| <i>HER2</i>          | erb-b2 receptor tyrosine kinase 2                                      | v-erb-b2 avian erythroblastic leukemia viral oncogene homolog 2 (neuro/glioblastoma derived oncogene homolog) |
| <i>KRAS</i>          | KRAS proto-oncogene, GTPase                                            | v-Ki-ras2 Kirsten rat sarcoma 2 viral oncogene homolog                                                        |
| <i>MAPK1</i>         | Mitogen-activated protein kinase 1                                     | -                                                                                                             |
| <i>MAP2K1 (MEK)</i>  | Mitogen-activated protein kinase kinase 1                              | MAPK/ERK kinase 1                                                                                             |
| <i>MET</i>           | MET proto-oncogene, receptor tyrosine kinase                           | met proto-oncogene                                                                                            |
| <i>MLH1</i>          | mutL homolog 1                                                         | mutL (E. coli) homolog 1 (colon cancer, nonpolyposis type 2)                                                  |
| <i>MSH2</i>          | mutS homolog 2                                                         | mutS (E. coli) homolog 2 (colon cancer, nonpolyposis type 1)                                                  |
| <i>MSH6</i>          | mutS homolog 6                                                         | mutS (E. coli) homolog 6                                                                                      |
| <i>NRAS</i>          | NRAS proto-oncogene, GTPase                                            | neuroblastoma RAS viral (v-ras) oncogene homolog                                                              |
| <i>NTRK1</i>         | Neurotrophic receptor tyrosine kinase 1                                | Neurotrophic tyrosine kinase, receptor, type 1                                                                |
| <i>NTRK2</i>         | Neurotrophic receptor tyrosine kinase 2                                | Neurotrophic tyrosine kinase, receptor, type 2                                                                |
| <i>NTRK3</i>         | Neurotrophic receptor tyrosine kinase 3                                | Neurotrophic tyrosine kinase, receptor, type 3                                                                |
| <i>PALB2</i>         | Partner and localizer of BRCA2                                         | -                                                                                                             |
| <i>PDCD1 (PD1)</i>   | Programmed cell death 1                                                | Systemic lupus erythematosus susceptibility 2                                                                 |
| <i>CD274 (PD-L1)</i> | CD274 molecule                                                         | Programmed cell death 1 ligand 1                                                                              |
| <i>PIK3CA</i>        | Phosphatidylinositol-4,5-bisphosphate 3-kinase catalytic subunit alpha | Phosphoinositide-3-kinase, catalytic, alpha polypeptide                                                       |

|               |                                                  |                                                                |
|---------------|--------------------------------------------------|----------------------------------------------------------------|
| <i>PMS2</i>   | PMS1 homolog 2, mismatch repair system component | Postmeiotic segregation increased ( <i>S. cerevisiae</i> ) 2   |
| <i>RAD51C</i> | RAD51 paralog C                                  | RAD51 ( <i>S. cerevisiae</i> ) homolog C                       |
| <i>RET</i>    | ret proto-oncogene                               | Multiple endocrine neoplasia and medullary thyroid carcinoma 1 |
| <i>ROS1</i>   | ROS proto-oncogene 1, receptor tyrosine kinase   | v-ros avian UR2 sarcoma virus oncogene homolog 1               |
| <i>TP53</i>   | Tumor protein p53                                | -                                                              |

\* HUGO Gene Nomenclature Committee at the University of Cambridge

\*\* Gene names often reflect rather historical context of their discovery than actual gene function or its medical significance
